# Supplementary material
Source: PubMed Central journal article supplement (PMC4303633)
Supplement: ismej2014137x2.pdf [file ismej2014137x2.pdf]

*Figure S1*

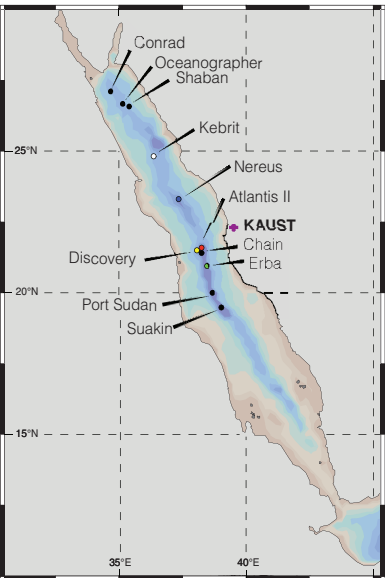

**Figure S1.** Map depicting the geographic position of some of Red Sea's deep hypersaline anoxic brines, five of which were part of this study:

Atlantis II Deep, Discovery Deep, Erba Deep, Nereus Deep, and Kebrit Deep.

Figure S2

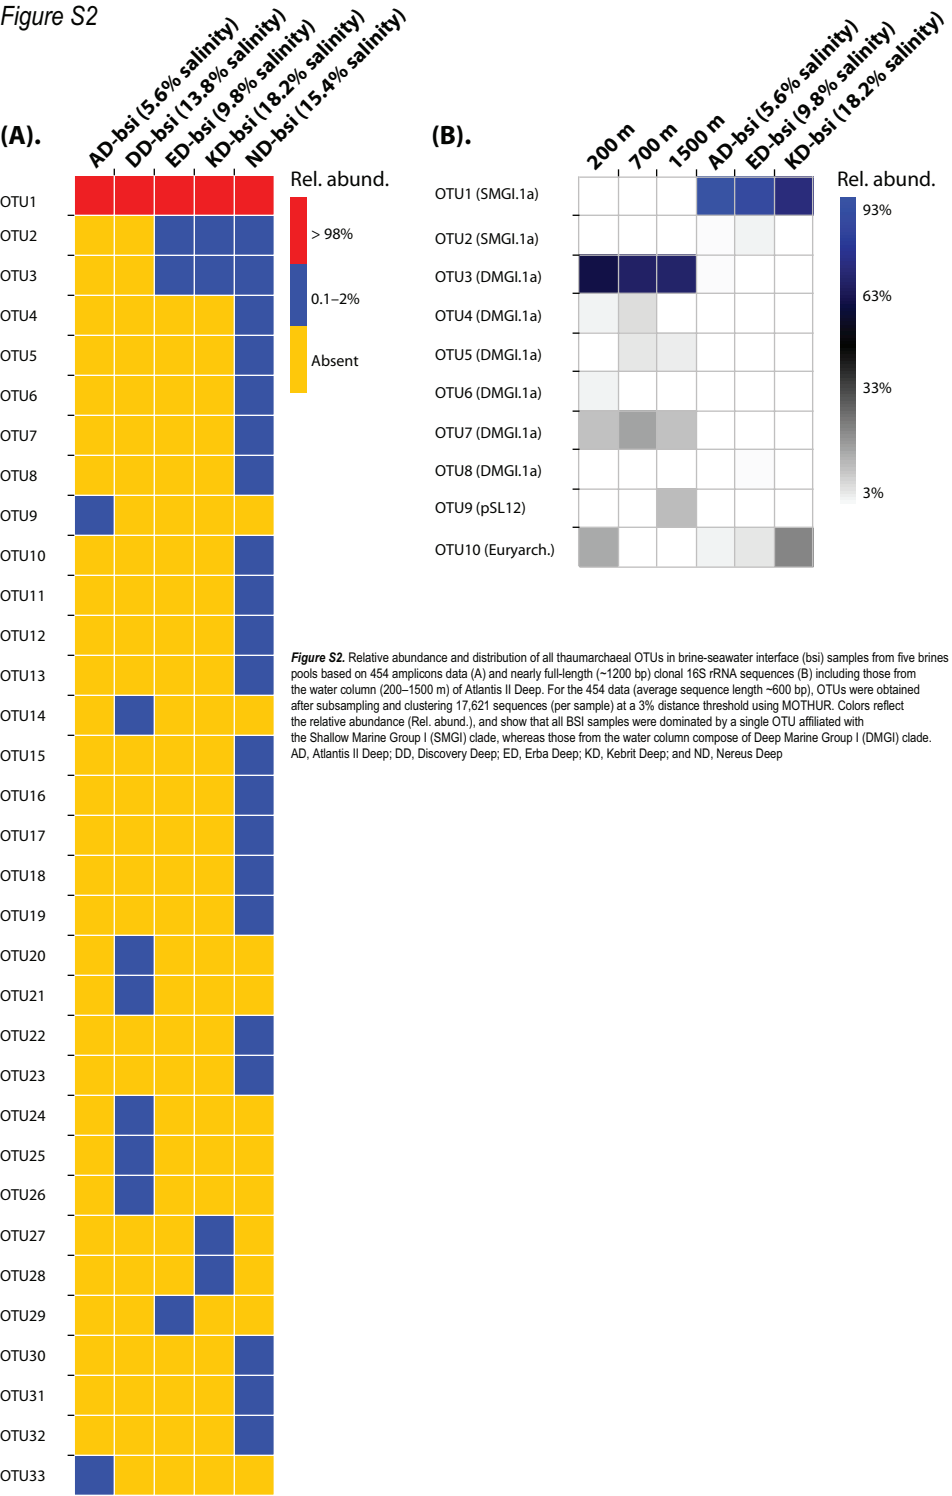

(A)

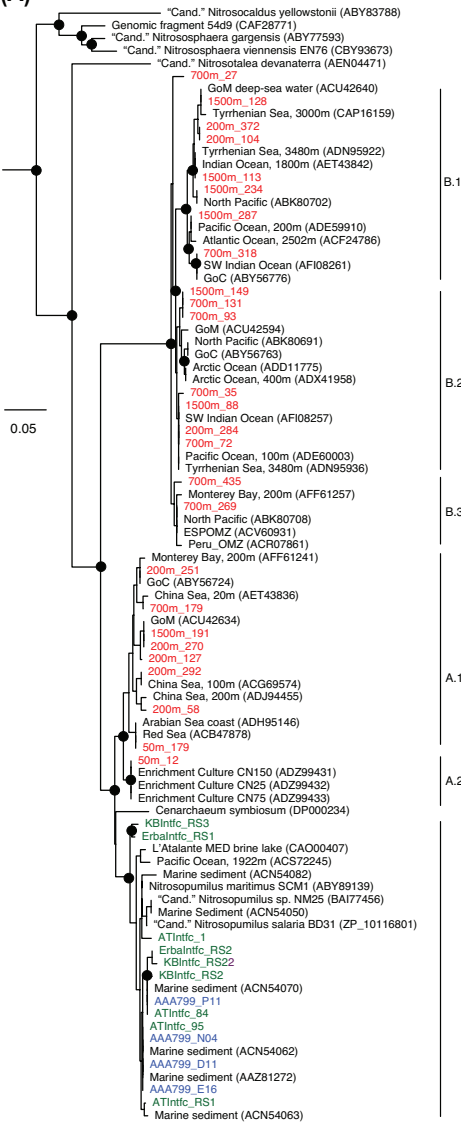

(B)

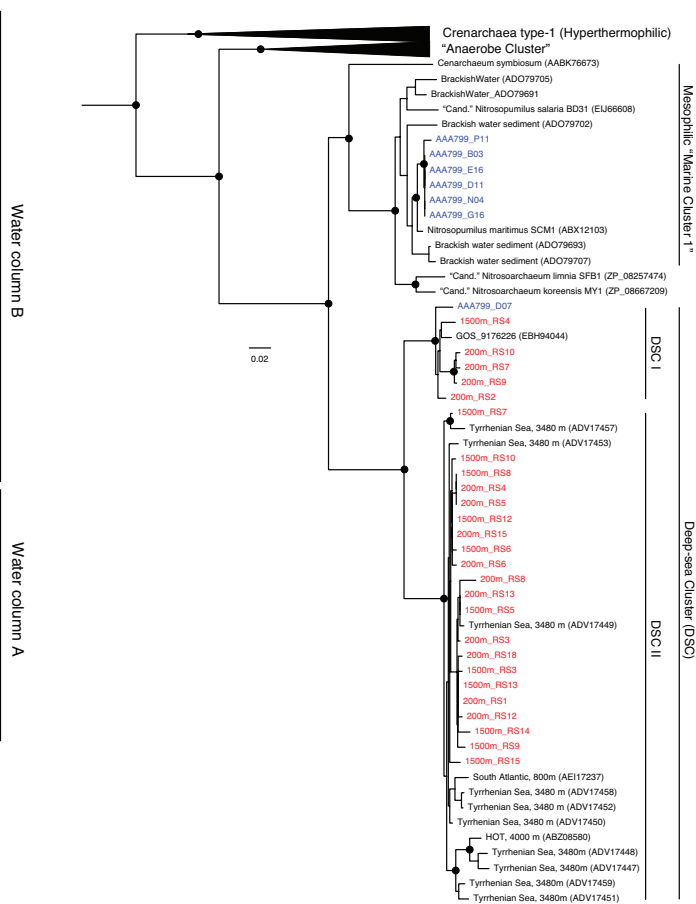

**Figure S3.** Phylogeny of putative AOA present in the water column overlying Atlantis II Deep (50–1500 m; in red) and the brine-seawater interface of different brine pools (in green), based on the *amoA* (A) and 4-hydroxybutyryl-CoA dehydrogenase (B) gene sequences. Sequences obtained from single-cell amplified genomes (SAGs) are shown in blue. The phylogenetic trees were inferred using the neighbor-joining approach with a Jukes-Cantor distance correction matrix based on 1000 replications, with bootstrap support values  $\geq 70\%$  displayed as a black-filled circle at the nodes. The nomenclature for the *amoA* and 4-*hbdA* follows that from Francis et al. (2005) and Yakhimov et al. (2011), respectively.

Figure S4

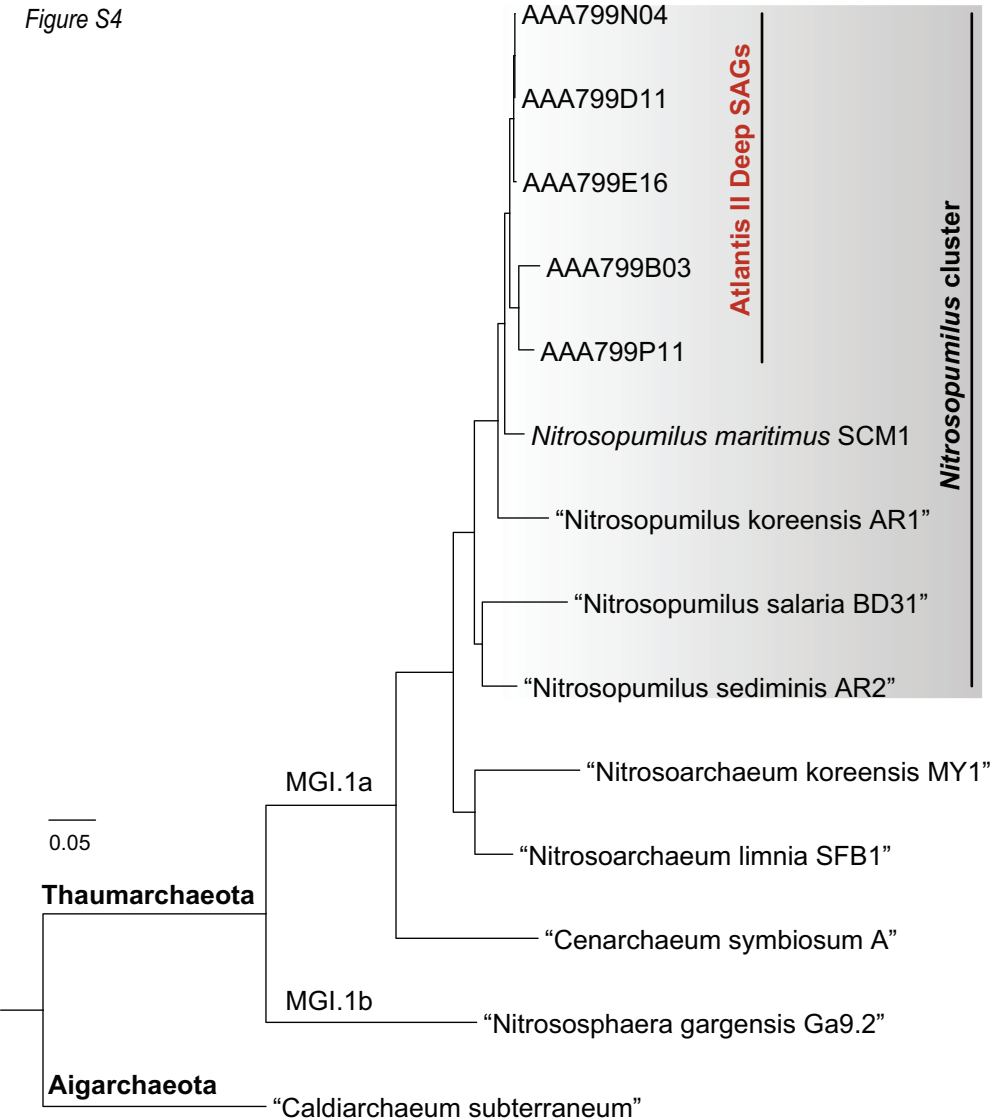

**Figure S4.** Core genes-based phylogenetic tree showing the tight clustering of our single-cell amplified genomes (SAGs), in particular E16, D11, and N04, whose reads were chosen for a combined genome assembly. The maximum-likelihood tree is inferred from a concatenation of 131 shared, single-copy genes present in these SAGs and other Thaumarchaea using RAxML under the PROTGAMMAI+WAG amino acid substitution model. All nodes are well supported with 100% bootstraps values (not shown) after 1000 replications.

Figure S5

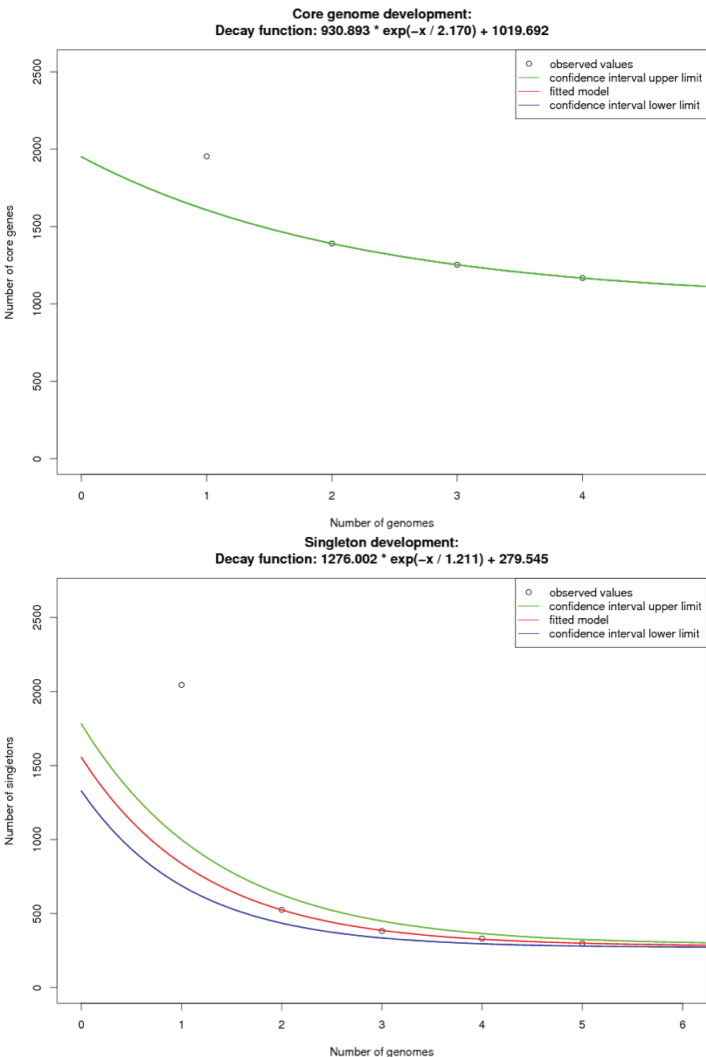

**Figure S5.** Core and singletons development plots predicting the number of core or unique genes that would be uncovered with addition of more *Nitrosopumilus* genomes. The curves are fitted with a nonlinear decay function. The asymptotic nature of the singletons plot (lower panel), with unique gene counts not approaching zero, means that we still have an open pan-genome.

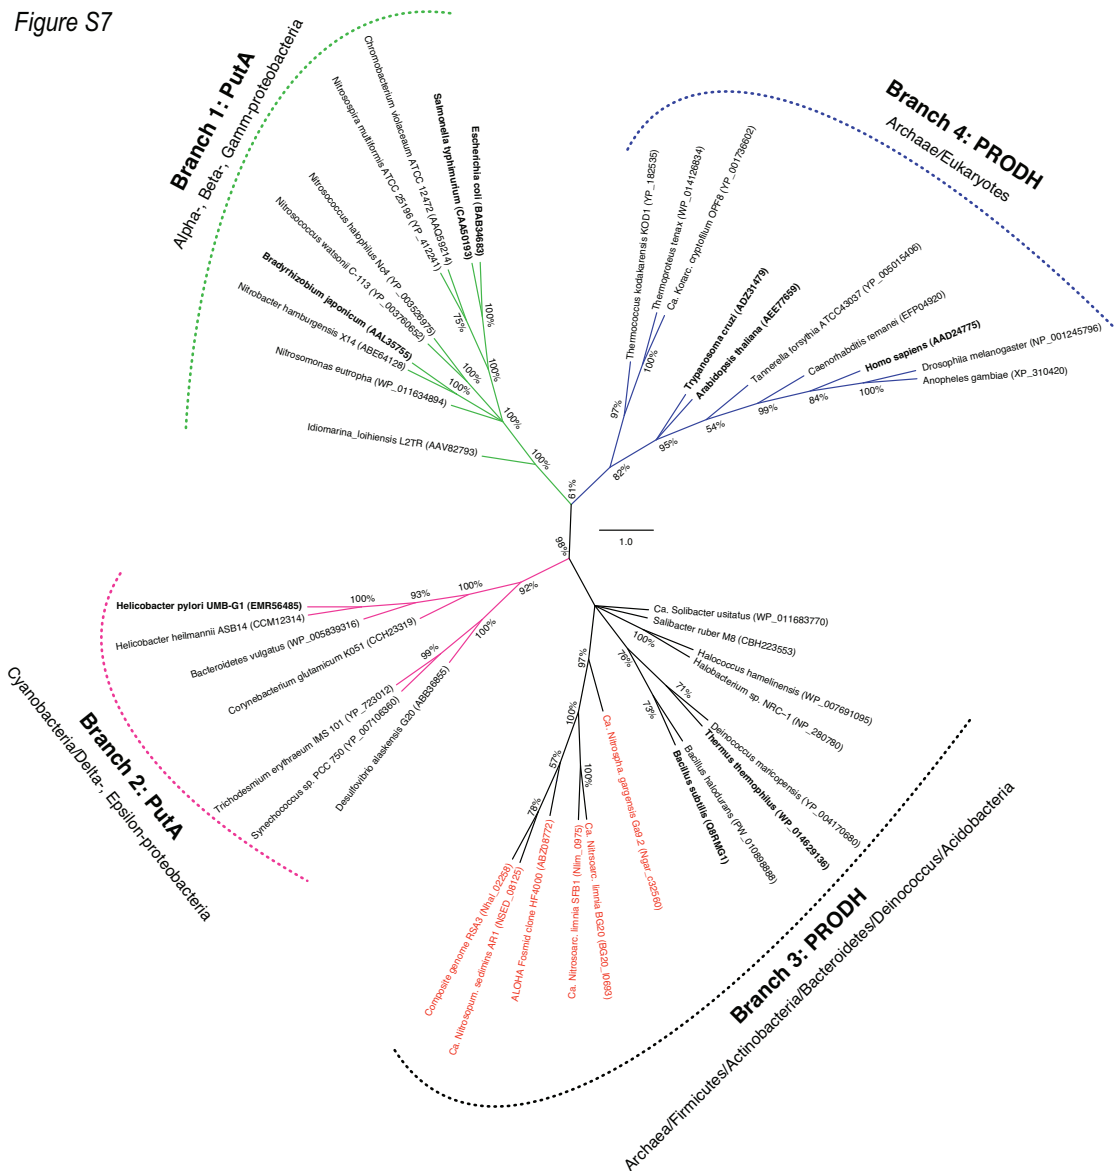

**Figure S6.** An unrooted maximum-likelihood tree, showing the phylogeny of proline utilization (PutA) and proline dehydrogenase (PRODH) gene clusters.

The nomenclature follows that of White et al. (2007; see Figure S1 in this publication) but now includes archaeal and eukaryotic sequences (this study). Each branch contains at least a single species with characterized proteins (in bold), while PRODH-containing thaumarchaea are shown in red. Methods are provided in supplementary materials.
